# Supplementary material for: Sex-dependent association of circulating sex steroids and pituitary hormones with treatment-free survival in chronic lymphocytic leukemia patients
Source: Springer Nature journal article supplement (doi:10.1007/s00277-018-3356-z), 2018-05-20
Supplement: MOESM1 [file 15778558]

## **Supplementary Material**

### **1. Supplementary Methods**

**1.1** Mass spectrometry-based quantification of steroids.

### **2. Supplementary Tables**

**2.1 Supplementary Table 1** Circulating hormones in men and women CLL patients

**2.2 Supplementary Table 2** Circulating steroid levels of men with CLL compared to those of healthy individuals

**2.3 Supplementary Table 3** Circulating steroid levels of women with CLL compared to those of healthy individuals

**2.4 Supplementary Table 4** Association of high or low *UGT2B17* mRNA expression in peripheral mononuclear blood cells (PBMCs) with treatment-free survival (TFS) in CLL patients (male and female combined)

**2.5 Supplementary Table 5** Treatment free survival (TFS) is not significantly affected by *UGT2B17* deletion polymorphism

**2.6 Supplementary Table 6** Circulating hormone levels of CLL patients in relation to the *UGT2B17* deletion polymorphism

# 1. Methods

## 1.1 Mass spectrometry-based quantification of steroids

Steroids were purchased from Steraloids (Newport, RI, USA). Internal deuterated standards were added to samples. Deuterated standards were from C/D/N Isotopes (Montréal, QC, Canada), except d3-DHEA, which was synthesized by the Organic Synthesis Service of the CHU de Québec Research Center (Québec, QC, Canada). Quality controls were prepared in non-adsorbed serum samples to obtain low, medium or high analyte concentrations and were included in each run, along with a seven-point calibration curve prepared by spiking, as well as blanks.

For catechol estrogen (reported as the sum of conjugated plus unconjugated forms), we used 250  $\mu$ L of serum for extraction with a LLOQ of 5 pg/mL (ratio of signal-to-noise was  $\geq 5:1$  corresponding to 16.56-18.52 pmol/L depending on the estrogen). Samples were treated with  $\beta$ -glucuronidase/sulfatase prior to extraction with ethyl acetate:chlorobutane (25:75, v/v) and evaporated to dryness. Derivatization was then conducted with dansyl chloride (0.5 mg/mL final in 50% acetone and 50 mM sodium bicarbonate, pH 9.0). Samples were heated for 5 minutes at 60°C, mixed with 15 volumes of water:methanol (80:20, v/v) and loaded on pre-conditioned Strata X 60 mg SPE columns (Phenomenex, Torrance, CA, USA). After being washed with water and water:methanol (10:90, v/v), CE were eluted with dichloromethane:methanol (50:50, v/v) and evaporated to dryness at 45°C under nitrogen gas, reconstituted in 100  $\mu$ L of acetone:water (75:25, v/v), and injected into a HPLC Waters alliance 2690 (Milford, MA, USA). The chromatographic separation was achieved with a Synergie RP Hydro column containing 2.5  $\mu$ m packing material, 100 X 3 mm (Phenomenex, Torrance, USA). The mobile phases consisted of water with 0.0375% formic acid (solvent A) and MeOH with 0.0375% formic acid (solvent B). The flow rate was 0.5 ml/min with the following program: 0-8 min, isocratic 22.5% B; 8-18 min, linear gradient 22.5-35% B; 18-23 min, isocratic 35% B; 23-23.1 min, linear

gradient 35-95% B; 23.1-28 min, isocratic 95% B; 28.0-28.1 min, linear gradient 95-22.5% B and 28.1-33 min, isocratic 22.5% B. CE were detected with an API6500 (Concord, ON, Canada) equipped with a turbo ion-spray source set in positive ion mode, and operated in multiple reaction monitoring mode (MRM).

## 2. Supplementary Tables

**2.1 Supplementary Table 1** Circulating hormones in men and women CLL patients.

| Plasma steroid levels           | Men (n=95)<br>Mean ± SEM | Women (n=61)<br>Mean ± SEM | Ratio<br>Men/Women |
|---------------------------------|--------------------------|----------------------------|--------------------|
| <b>Adrenal precursors</b>       |                          |                            |                    |
| DHEA-S (µg/mL)                  | 0.75 ± 0.07              | 0.49 ± 0.05                | <b>1.5</b>         |
| DHEA (ng/mL)                    | 1.35 ± 0.12              | 1.56 ± 0.15                | 0.9                |
| 5-diol (pg/mL)                  | 577.21 ± 37.01           | 384.21 ± 36.48             | <b>1.5</b>         |
| <b>Androgens</b>                |                          |                            |                    |
| 4-dione (ng/mL)                 | 0.82 ± 0.03              | 0.52 ± 0.04                | <b>1.6</b>         |
| Testo (ng/mL)                   | 3.86 ± 0.20              | 0.26 ± 0.06                | <b>15.1</b>        |
| DHT (pg/mL)                     | 293.86 ± 17.63           | 36.18 ± 6.13               | <b>8.0</b>         |
| ADT (pg/mL)                     | 140.06 ± 9.01            | 93.85 ± 8.94               | <b>1.4</b>         |
| 3β-diol (pg/mL)                 | 18.72 ± 1.36             | 7.68 ± 0.83                | <b>2.3</b>         |
| ADT-G (ng/mL)                   | 29.72 ± 2.09             | 13.37 ± 1.34               | <b>2.2</b>         |
| 3α-diol-17G (ng/mL)             | 3.36 ± 0.28              | 0.40 ± 0.06                | <b>8.4</b>         |
| 3α-diol-3G (ng/mL)              | 1.63 ± 0.13              | 0.60 ± 0.05                | <b>2.7</b>         |
| <b>Estrogen</b>                 |                          |                            |                    |
| E <sub>1</sub> -S (ng/mL)       | 0.43 ± 0.04              | 0.15 ± 0.02                | <b>2.9</b>         |
| E <sub>1</sub> (pg/mL)          | 26.59 ± 1.52             | 16.80 ± 1.26               | <b>1.6</b>         |
| E <sub>2</sub> (pg/mL)          | 17.33 ± 0.86             | 3.37 ± 0.52                | <b>4.9</b>         |
| <b>Receptor ligands*</b>        |                          |                            |                    |
| ER-ligands (pg/mL)              | 639.86 ± 38.00           | 411.35 ± 37.49             | <b>1.6</b>         |
| AR-ligands (ng/mL)              | 4.15 ± 0.21              | 0.29 ± 0.07                | <b>14.3</b>        |
| <b>Catechol estrogens (CE)†</b> |                          |                            |                    |
|                                 | (n=83)                   | (n=51)                     |                    |
| 2/4OH-CE (pg/mL)                | 55.08 ± 5.69             | 36.25 ± 6.80               | <b>1.5</b>         |
| 16OH-CE (pg/mL)                 | 205.46 ± 25.98           | 103.62 ± 25.59             | <b>2.0</b>         |
| MeO-CE (pg/mL)                  | 38.90 ± 2.04             | 32.92 ± 2.29               | <b>1.2</b>         |
| <b>Pituitary gonadotropins</b>  |                          |                            |                    |
|                                 | (n=83)                   | (n=51)                     |                    |
| LH (mIU/mL)                     | 6.63 ± 0.68              | 17.49 ± 1.21               | <b>0.4</b>         |
| FSH (mIU/mL)                    | 11.94 ± 1.11             | 49.03 ± 2.32               | <b>0.2</b>         |

Significant ( $P<0.05$ ) ratios are in bold; trends ( $P<0.10$ ) are in italics, based on Mann-Whitney-Wilcoxon test. Hormone levels for all cases were available, except catechol estrogens and gonadotropins (134/156); SEM - standard error of the mean.

\*ER-ligands corresponds to the sum of E<sub>1</sub>, E<sub>2</sub>, 5-diol, 3β-diol; AR-ligands corresponds to the sum of Testo and DHT. ER - estrogen receptor; AR = androgen receptor.

†2/4OH-CE corresponds to the sum of 2OHE<sub>1</sub> and 4OHE<sub>1</sub>. 16OH-CE corresponds to the sum of E<sub>3</sub>, 16epiE<sub>3</sub>, 16ketoE<sub>2</sub>, and 16αOHE<sub>1</sub>. Sum of MeO-CE corresponds to the sum of 2MeOE<sub>1</sub> and 4MeOE<sub>1</sub>. CE - catechol estrogens.

In men, a partial negative correlation was noted between LH and FSH and levels of DHEA-S, DHEA, ADT and E<sub>1</sub>-S (correlation values of  $r = -0.22$  to  $-0.51$ ;  $P<0.05$ ). In women, a partial positive correlation was noted between LH and levels of ADT-G (correlation values of  $r = -0.22$  to  $-0.51$ ;  $P=0.007$ ).

**2.2 Supplementary Table 2** Circulating steroid levels of men with CLL compared to those of healthy individuals.

| Plasma steroid levels          | Men CLL cases                | Healthy men      | Ratio<br>C/H | Healthy men                 | Ratio<br>C/H |
|--------------------------------|------------------------------|------------------|--------------|-----------------------------|--------------|
|                                | Austria (n=95)<br>Mean ± SEM | Austria (n=5)    |              | Canada (n=15)<br>Mean ± SEM |              |
| <b>Adrenal precursors</b>      |                              |                  |              |                             |              |
| DHEA-S (µg/mL)                 | 0.75 ± 0.07                  | 1.71 ± 0.44      | <b>0.44</b>  | 1.96 ± 0.22                 | <b>0.38</b>  |
| DHEA (ng/mL)                   | 1.35 ± 0.12                  | 5.79 ± 1.70      | <b>0.23</b>  | 4.84 ± 0.75                 | <b>0.28</b>  |
| 5-diol (pg/mL)                 | 577.21 ± 37.01               | 1186.57 ± 445.38 | 0.49         | 1155.36 ± 115.59            | <b>0.50</b>  |
| <b>Androgens</b>               |                              |                  |              |                             |              |
| 4-dione (ng/mL)                | 0.82 ± 0.03                  | 1.53 ± 0.39      | <i>0.54</i>  | 1.22 ± 0.11                 | <b>0.67</b>  |
| Testo (ng/mL)                  | 3.86 ± 0.20                  | 5.11 ± 1.26      | 0.75         | 4.80 ± 0.35                 | <b>0.80</b>  |
| DHT (pg/mL)                    | 293.86 ± 17.63               | 381.42 ± 94.35   | 0.77         | 358.92 ± 34.17              | 0.82         |
| ADT (pg/mL)                    | 140.06 ± 9.01                | 273.47 ± 58.03   | <b>0.52</b>  | 257.18 ± 23.90              | <b>0.55</b>  |
| 3β-diol (pg/mL)                | 18.72 ± 1.36                 | 18.56 ± 7.25     | 1.02         | 46.53 ± 4.66                | <b>0.41</b>  |
| ADT-G (ng/mL)                  | 29.72 ± 2.09                 | 36.66 ± 8.18     | 0.81         | 55.18 ± 6.65                | <b>0.54</b>  |
| 3α-diol-17G (ng/mL)            | 3.36 ± 0.28                  | 2.79 ± 0.48      | 1.21         | 4.38 ± 0.53                 | <b>0.77</b>  |
| 3α-diol-3G (ng/mL)             | 1.63 ± 0.13                  | 1.25 ± 0.29      | 1.30         | 2.43 ± 0.34                 | <b>0.67</b>  |
| <b>Estrogens</b>               |                              |                  |              |                             |              |
| E <sub>1</sub> -S (ng/mL)      | 0.43 ± 0.04                  | 0.43 ± 0.17      | 1.01         | 0.43 ± 0.11                 | 0.99         |
| E <sub>1</sub> (pg/mL)         | 26.59 ± 1.52                 | 29.27 ± 1.83     | 0.91         | 22.51 ± 2.03                | 1.18         |
| E <sub>2</sub> (pg/mL)         | 17.33 ± 0.86                 | 19.72 ± 2.64     | 0.88         | 19.56 ± 2.01                | 0.89         |
| <b>Receptor ligands*</b>       |                              |                  |              |                             |              |
| ER-ligands (pg/mL)             | 639.86 ± 38.01               | 1254.12 ± 450.76 | 0.51         | 1243.96 ± 118.21            | <b>0.51</b>  |
| AR-ligands (ng/mL)             | 4.15 ± 0.21                  | 5.49 ± 1.35      | 0.76         | 5.15 ± 0.36                 | <b>0.81</b>  |
| <b>Catechol estrogens</b>      |                              |                  |              |                             |              |
| (CE)†                          | (n=83)                       | (n=5)            |              |                             |              |
| 2/4OH-CE (pg/mL)               | 55.08 ± 5.69                 | 41.62 ± 14.13    | 1.32         | -                           |              |
| 16OH-CE (pg/mL)                | 205.46 ± 25.98               | 78.52 ± 6.41     | 2.62         | -                           |              |
| MeO-CE (pg/mL)                 | 38.90 ± 2.04                 | 37.31 ± 7.86     | 1.04         | -                           |              |
| <b>Pituitary gonadotropins</b> |                              |                  |              |                             |              |
|                                | (n=83)                       | (n=5)            |              | (n=12)                      |              |
| LH (mIU/mL)                    | 6.63 ± 0.68                  | 2.49 ± 0.72      | <b>2.66</b>  | 4.72 ± 0.56                 | 1.40         |
| FSH (mIU/mL)                   | 11.94 ± 1.11                 | 3.12 ± 0.62      | <b>3.83</b>  | 5.57 ± 1.39                 | <b>2.14</b>  |

Significant ( $P<0.05$ ) ratios are in bold, trends ( $P<0.10$ ) are in italics, based on Mann-Whitney-Wilcoxon test. Hormone levels for all cases were available, except catechol estrogens and gonadotropins (134/156); SEM - standard error of the mean. Ratio C/H = ratio between levels observed in cases/healthy.

\*ER-ligands corresponds to the sum of E<sub>1</sub>, E<sub>2</sub>, 5-diol, 3β-diol; AR-ligands corresponds to the sum of Testo and DHT. ER - estrogen receptor; AR = androgen receptor.

†2/4OH-CE corresponds to the sum of 2OHE<sub>1</sub> and 4OHE<sub>1</sub>. 16OH-CE corresponds to the sum of E<sub>3</sub>, 16epiE<sub>3</sub>, 16ketoE<sub>2</sub>, and 16αOHE<sub>1</sub>. Sum of MeO-CE corresponds to the sum of 2MeOE<sub>1</sub> and 4MeOE<sub>1</sub>. CE - catechol estrogens.

**2.3 Supplementary Table 3** Circulating steroid levels of women with CLL compared to those of healthy individuals.

| Plasma steroid levels              | Women CLL cases              | Healthy women  | Ratio<br>C/H | Healthy women                | Ratio<br>C/H |
|------------------------------------|------------------------------|----------------|--------------|------------------------------|--------------|
|                                    | Austria (n=61)<br>Mean ± SEM | Austria (n=5)  |              | Canada (n=110)<br>Mean ± SEM |              |
| <b>Adrenal precursors</b>          |                              |                |              |                              |              |
| DHEA-S (µg/mL)                     | 0.49 ± 0.05                  | 0.94 ± 0.28    | <i>0.52</i>  | 0.70 ± 0.04                  | <b>0.70</b>  |
| DHEA (ng/mL)                       | 1.56 ± 0.15                  | 2.66 ± 0.69    | <i>0.59</i>  | 2.25 ± 0.14                  | <b>0.69</b>  |
| 5-diol (pg/mL)                     | 384.21 ± 36.48               | 225.58 ± 86.40 | 1.70         | 259.09 ± 15.58               | <b>1.48</b>  |
| <b>Androgens</b>                   |                              |                |              |                              |              |
| 4-dione (ng/mL)                    | 0.52 ± 0.04                  | 0.50 ± 0.07    | 1.05         | 0.48 ± 0.02                  | 1.10         |
| Testo (ng/mL)                      | 0.26 ± 0.06                  | 0.23 ± 0.05    | 1.13         | 0.15 ± 0.01                  | <b>1.67</b>  |
| DHT (pg/mL)                        | 36.18 ± 6.13                 | 39.28 ± 8.43   | 0.94         | 36.36 ± 2.14                 | 1.01         |
| ADT (pg/mL)                        | 93.85 ± 8.94                 | 123.51 ± 20.86 | 0.83         | -                            |              |
| 3β-diol (pg/mL)                    | 7.68 ± 0.83                  | 9.82 ± 3.15    | 0.82         | -                            |              |
| ADT-G (ng/mL)                      | 13.37 ± 1.34                 | 16.97 ± 6.98   | 0.79         | 15.21 ± 0.89                 | <i>0.88</i>  |
| 3α-diol-17G (ng/mL)                | 0.40 ± 0.06                  | 0.46 ± 0.10    | 0.87         | 0.73 ± 0.09                  | <b>0.54</b>  |
| 3α-diol-3G (ng/mL)                 | 0.60 ± 0.05                  | 0.71 ± 0.13    | 0.85         | 0.67 ± 0.06                  | 0.91         |
| <b>Estrogen</b>                    |                              |                |              |                              |              |
| E <sub>1</sub> -S (ng/mL)          | 0.15 ± 0.02                  | 0.46 ± 0.27    | 0.32         | 0.25 ± 0.03                  | <b>0.58</b>  |
| E <sub>1</sub> (pg/mL)             | 16.80 ± 1.26                 | 22.87 ± 4.54   | 0.73         | 21.14 ± 1.20                 | <b>0.79</b>  |
| E <sub>2</sub> (pg/mL)             | 3.37 ± 0.52                  | 10.99 ± 5.98   | 0.32         | 5.86 ± 1.00                  | <b>0.60</b>  |
| <b>Receptor ligands</b>            |                              |                |              |                              |              |
| ER-ligands (pg/mL)                 | 411.35 ± 37.49               | 267.29 ± 93.43 | 1.54         | 286.08 ± 16.19               | 1.44         |
| AR-ligands (ng/mL)                 | 0.29 ± 0.07                  | 0.27 ± 0.06    | 1.10         | 0.19 ± 0.01                  | 1.55         |
| <b>Catechol estrogens<br/>(CE)</b> |                              |                |              |                              |              |
|                                    | (n=51)                       | (n=5)          |              |                              |              |
| 2/4OH-CE (pg/mL)                   | 36.25 ± 6.80                 | 30.96 ± 11.58  | 1.17         | -                            |              |
| 16OH-CE (pg/mL)                    | 103.62 ± 25.59               | 58.97 ± 14.70  | 1.76         | -                            |              |
| MeO-CE (pg/mL)                     | 32.92 ± 2.29                 | 31.92 ± 5.39   | 1.03         | -                            |              |
| <b>Pituitary<br/>gonadotropins</b> |                              |                |              |                              |              |
|                                    | (n=51)                       | (n=5)          |              | (n=110)                      |              |
| LH (mIU/mL)                        | 17.49 ± 1.21                 | 25.47 ± 3.41   | <b>0.67</b>  | 25.33 ± 0.33                 | <b>0.69</b>  |
| FSH (mIU/mL)                       | 49.03 ± 2.32                 | 72.57 ± 8.43   | <b>0.68</b>  | 66.35 ± 2.01                 | <b>0.74</b>  |

Significant ( $P<0.05$ ) ratios are in bold, trends ( $P<0.10$ ) are in italics, based on Mann-Whitney-Wilcoxon test. Hormone levels for all cases were available, except catechol estrogens and gonadotropins (134/156); SEM - standard error of the mean. Ratio C/H = ratio between levels observed in cases/healthy.

\*ER-ligands corresponds to the sum of E<sub>1</sub>, E<sub>2</sub>, 5-diol, 3β-diol; AR-ligands corresponds to the sum of Testo and DHT. ER - estrogen receptor; AR = androgen receptor.

†2/4OH-CE corresponds to the sum of 2OHE<sub>1</sub> and 4OHE<sub>1</sub>. 16OH-CE corresponds to the sum of E<sub>3</sub>, 16epiE<sub>3</sub>, 16ketoE<sub>2</sub>, and 16αOHE<sub>1</sub>. Sum of MeO-CE corresponds to the sum of 2MeOE<sub>1</sub> and 4MeOE<sub>1</sub>. CE - catechol estrogens.

- : not available

**2.4 Supplementary Table 4** Association of high or low *UGT2B17* mRNA expression in peripheral mononuclear blood cells (PBMCs) with treatment-free survival (TFS) in CLL patients (male and female combined).

|                            | <b>UGT2B17-high</b><br>% (n=66) | <b>UGT2B17-low</b><br>% (n=87) |
|----------------------------|---------------------------------|--------------------------------|
| <b>TFS, median (mo)</b>    | <b>75.5</b>                     | <b>126.3</b>                   |
| <b>Requiring treatment</b> | <b>69.7% (n=46)</b>             | <b>51.2% (n=45)</b>            |

Significant ( $P < 0.05$ ) ratios are in bold, trends ( $P < 0.10$ ) are in italics. Calculated using the Kaplan-Meier method.

**2.5 Supplementary Table 5** Treatment free survival (TFS) is not significantly affected he *UGT2B17* deletion polymorphism.

| <b>Men (n=95)</b><br>Median TFS (months) |                   | <b>Women (n=60)<sup>1</sup></b><br>Median TFS (months) |                      |
|------------------------------------------|-------------------|--------------------------------------------------------|----------------------|
| 0 copy<br>(n=14)                         | 1-2 copies (n=81) | 0 copy<br>(n=9)                                        | 1-2 copies<br>(n=49) |
| 61.9                                     | 82.4              | 254                                                    | 126                  |

Significant ( $P < 0.05$ ) differences are in bold, trends ( $P < 0.10$ ) are in italics, based on the Log-rank test. Part of these data was included in the *UGT2B17* study by Gruber et al.<sup>18</sup> the information was complemented and updated for this study cohort.

0 copy = *UGT2B17*<sup>del/del</sup> or *UGT2B17*<sup>null</sup> genotype; 1-2 copies = patients carrying at least one copy of the *UGT2B17* gene.

<sup>1</sup>60 out of 61 women had *UGT2B17* copy number information.

**2.6 Supplementary Table 6** Circulating hormone levels of CLL patients in relation to the *UGT2B17* deletion polymorphism.

| Plasma steroid levels           | Men CLL cases (n = 95)      |                                 | Women CLL cases (n = 60)‡  |                                 |
|---------------------------------|-----------------------------|---------------------------------|----------------------------|---------------------------------|
|                                 | 0 copy (n=14)<br>Mean ± SEM | 1-2 copies (n=81)<br>Mean ± SEM | 0 copy (n=9)<br>Mean ± SEM | 1-2 copies (n=51)<br>Mean ± SEM |
| <b>Adrenal precursors</b>       |                             |                                 |                            |                                 |
| DHEA-S (µg/mL)                  | 0.83 ± 0.21                 | 0.74 ± 0.07                     | 0.40 ± 0.11                | 0.49 ± 0.05                     |
| DHEA (ng/mL)                    | 1.75 ± 0.62                 | 1.28 ± 0.09                     | 1.38 ± 0.27                | 1.53 ± 0.16                     |
| 5-diol (pg/mL)                  | 602.11 ± 71.25              | 572.91 ± 41.76                  | 330.48 ± 11.08             | 383.36 ± 38.78                  |
| <b>Androgens</b>                |                             |                                 |                            |                                 |
| 4-dione (ng/mL)                 | 0.98 ± 0.09                 | 0.79 ± 0.04                     | 0.51 ± 0.74                | 0.52 ± 0.04                     |
| Testo (ng/mL)                   | 4.69 ± 0.51                 | 3.71 ± 0.21                     | 0.19 ± 0.03                | 0.26 ± 0.04                     |
| DHT (pg/mL)                     | 381.91 ± 65.47              | 278.64 ± 16.99                  | 28.77 ± 4.83               | 36.91 ± 7.26                    |
| ADT (pg/mL)                     | 160.84 ± 22.47              | 136.47 ± 9.83                   | 106.83 ± 17.92             | 88.89 ± 9.86                    |
| 3β-diol (pg/mL)                 | 19.69 ± 2.52                | 18.55 ± 1.54                    | 9.71 ± 2.78                | 7.38 ± 0.87                     |
| ADT-G (ng/mL)                   | 29.97 ± 5.16                | 29.67 ± 2.30                    | 12.81 ± 3.84               | 13.03 ± 1.39                    |
| 3α-diol-17G (ng/mL)             | 2.79 ± 0.45                 | 3.46 ± 0.32                     | <b>0.15 ± 0.02</b>         | <b>0.44 ± 0.07</b>              |
| 3α-diol-3G (ng/mL)              | 1.40 ± 0.17                 | 1.67 ± 0.16                     | 0.50 ± 0.14                | 0.61 ± 0.06                     |
| <b>Estrogens</b>                |                             |                                 |                            |                                 |
| E <sub>1</sub> -S (ng/mL)       | 0.54 ± 0.12                 | 0.41 ± 0.04                     | 0.16 ± 0.06                | 0.14 ± 0.02                     |
| E <sub>1</sub> (pg/mL)          | 28.84 ± 3.63                | 26.20 ± 1.67                    | 19.84 ± 4.55               | 15.92 ± 1.23                    |
| E <sub>2</sub> (pg/mL)          | 19.65 ± 1.79                | 16.93 ± 0.95                    | 3.07 ± 0.90                | 3.30 ± 0.60                     |
| <b>Receptor ligands*</b>        |                             |                                 |                            |                                 |
| ER-ligands (pg/mL)              | 670.29 ± 71.14              | 634.53 ± 42.97                  | 363.11 ± 99.13             | 408.34 ± 40.16                  |
| AR-ligands (ng/mL)              | 5.07 ± 0.57                 | 3.99 ± 0.23                     | 0.22 ± 0.03                | 0.30 ± 0.08                     |
| <b>Catechol estrogens (CE)†</b> |                             |                                 |                            |                                 |
| 2/4OH-CE (pg/mL)                | (n=14)<br>48.25 ± 7.87      | (n=69)<br>56.46 ± 6.66          | (n=9)<br>35.10 ± 6.30      | (n=42)<br>36.53 ± 8.18          |
| 16OH-CE (pg/mL)                 | 154.84 ± 25.14              | 215.73 ± 30.75                  | 239.86 ± 128.33            | 74.43 ± 12.77                   |
| MeO-CE (pg/mL)                  | 40.17 ± 5.12                | 38.64 ± 2.24                    | 35.88 ± 6.81               | 32.28 ± 2.41                    |
| <b>Pituitary gonadotropins</b>  |                             |                                 |                            |                                 |
| LH (mIU/mL)                     | (n=14)<br>5.46 ± 1.00       | (n=69)<br>6.86 ± 0.79           | (n=9)<br>17.70 ± 3.64      | (n=42)<br>17.44 ± 1.28          |
| FSH (mIU/mL)                    | 7.87 ± 1.34                 | 12.77 ± 1.29                    | 42.56 ± 5.51               | 50.42 ± 2.54                    |

*UGT2B17* copy number variation is described as 0 = *UGT2B17*<sup>del/del</sup>; 1-2 copies = patients carrying at least one copy of the gene. Frequency of *UGT2B17*<sup>del/del</sup> or *UGT2B17*<sup>null</sup> genotype was of 14.7% and 15.0% in male and female cases respectively. Significant ( $P < 0.05$ ) ratios are in bold, trends ( $P < 0.10$ ) are in italics, based on Mann-Whitney-Wilcoxon test. Hormone levels for all cases were available, except catechol estrogens and gonadotropins (134/156); SEM - standard error of the mean. Ratio C/H = ratio between levels observed in cases/healthy.

\*ER-ligands corresponds to the sum of E<sub>1</sub>, E<sub>2</sub>, 5-diol, 3β-diol; AR-ligands corresponds to the sum of Testo and DHT. ER - estrogens receptor; AR = androgen receptor.

†2/4OH-CE corresponds to the sum of 2OHE<sub>1</sub> and 4OHE<sub>1</sub>. 16OH-CE corresponds to the sum of E<sub>3</sub>, 16epiE<sub>3</sub>, 16ketoE<sub>2</sub>, and 16αOHE<sub>1</sub>. Sum of MeO-CE corresponds to the sum of 2MeOE<sub>1</sub> and 4MeOE<sub>1</sub>. CE - catechol estrogens.

‡The *UGT2B17* deletion genotype was missing for one woman.
